# Supplementary material for: Population genomic sequencing of Coccidioides fungi reveals recent hybridization and transposon control
Source: HighWire-hosted journal article supplement (doi:10.1101/gr.103911.109), 2010-06-01
Supplement: Neafsey_SupTable4.pdf [file Neafsey_SupTable4.pdf]

**Table S4. Novel vaccine candidate loci with low polymorphism and high epitope density.**

| RS Gene ID | <i>C. immitis</i><br>$\pi$ | <i>C. posadasii</i><br>$\pi$ | HLA-I<br>epitopes | HLA-II<br>epitopes | Description                              |
|------------|----------------------------|------------------------------|-------------------|--------------------|------------------------------------------|
| CIMG_00642 | 0.00                       | 5.40E-04                     | 4                 | 5                  | Conserved hypothetical protein           |
| CIMG_02599 | 0.00                       | 6.43E-04                     | 3                 | 3                  | Conserved hypothetical protein           |
| CIMG_03437 | 0.00                       | 4.85E-04                     | 1                 | 4                  | Conserved hypothetical protein           |
| CIMG_04129 | 0.00                       | 3.64E-04                     | 3                 | 3                  | Predicted protein                        |
| CIMG_04758 | 0.00                       | 4.70E-04                     | 1                 | 3                  | Predicted protein                        |
| CIMG_04746 | 0.00                       | 1.59E-04                     | 7                 | 13                 | Conserved hypothetical protein           |
| CIMG_04894 | 0.00                       | 0.00E+00                     | 3                 | 1                  | Conserved hypothetical protein           |
| CIMG_07187 | 0.00                       | 0.00E+00                     | 2                 | 0                  | Conserved hypothetical protein           |
| CIMG_07738 | 0.00                       | 5.17E-04                     | 5                 | 3                  | Conserved hypothetical protein           |
| CIMG_08370 | 0.00                       | 0.00E+00                     | 2                 | 3                  | Predicted protein                        |
| CIMG_08533 | 0.00                       | 4.39E-04                     | 4                 | 8                  | Integral membrane protein (Yip1 domain)  |
| CIMG_09101 | 0.00                       | 0.00                         | 10                | 4                  | Integral membrane protein (ORMDL domain) |
| CIMG_10953 | 0.00                       | 0.00                         | 2                 | 0                  | Hypothetical protein                     |
| CIMG_11035 | 0.00                       | 0.00                         | 1                 | 3                  | Conserved hypothetical protein           |
| CIMG_11821 | 0.00                       | 5.19E-04                     | 2                 | 5                  | Predicted protein                        |
| CIMG_12464 | 0.00                       | 0.00                         | 5                 | 3                  | Conserved hypothetical protein           |
